# Supplementary material for: Transcriptional Regulation of Cellulose Biosynthesis during the Early Phase of Nitrogen Deprivation in Nannochloropsis salina
Source: PubMed Central journal article supplement (PMC5509672; doi:10.1038/s41598-017-05684-4), 2017-07-13
Supplement: 41598_2017_5684_MOESM1_ESM.pdf [file 41598_2017_5684_MOESM1_ESM.pdf]

1 **Supplementary Materials**  
2  
3

4 **Transcriptional Regulation of Cellulose Biosynthesis during the Early Phase of Nitrogen**  
5 **Deprivation in *Nannochloropsis salina***  
6

7 Seok Won Jeong<sup>1</sup>, Seung Won Nam<sup>2</sup>, Kwon HwangBo<sup>3</sup>, Won Joong Jeong<sup>3</sup>, Byeong-ryool Jeong<sup>4</sup>,  
8 Yong Keun Chang<sup>4,5</sup> & Youn-Il Park<sup>1,\*</sup>  
9

10 <sup>1</sup>Department of Biological Sciences, Chungnam National University, Daejeon 34134, Korea

11 <sup>2</sup>Bioresources Culture Collection Division, Nakdonggang National Institute of Biological Resources,  
12 Sangju 37242, Korea

13 <sup>3</sup>Korea Research Institute of Bioscience and Biotechnology, Daejeon 34141, Korea

14 <sup>4</sup>Department of Chemical and Biomolecular Engineering, Korea Advanced Institute of Science and  
15 Technology, Daejeon 34141, Korea

16 <sup>5</sup>Advanced Biomass R&D Center (ABC), Korea Advanced Institute of Science and Technology,  
17 Daejeon 34141, Korea  
18  
19

20 \*Corresponding author: Youn-Il Park

21 E-mail: yipark@cnu.ac.kr; Phone: +82-42-8215493; FAX: +82-42-8229690  
22  
23  
24

1 **Supplementary Figure Legends**

2

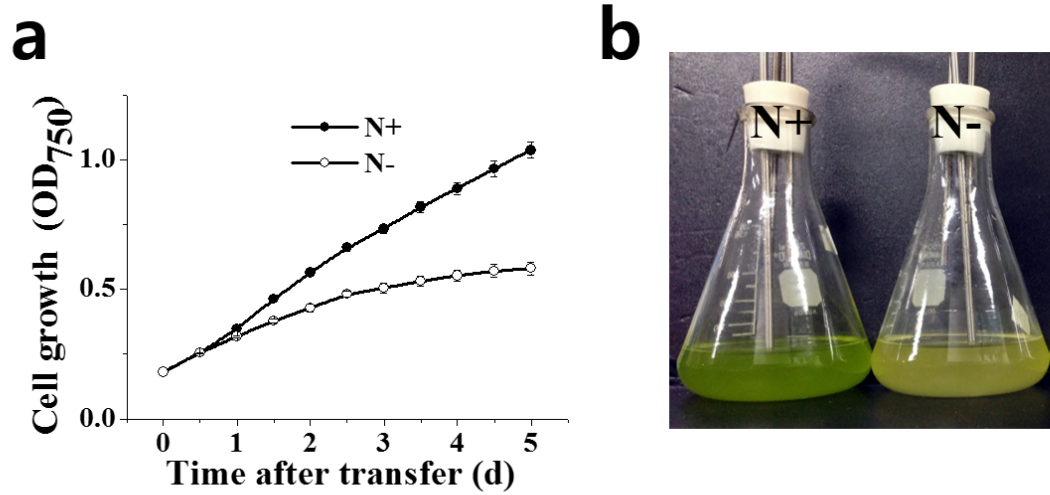

3

4 **Figure S1. Cell growth (a) and culture images (b) of *N. salina* cells grown under N+ and N-**  
5 **conditions for 2 days.** Each data point represents the mean  $\pm$  SE of three biological and technical  
6 triplicate culture flasks.

7

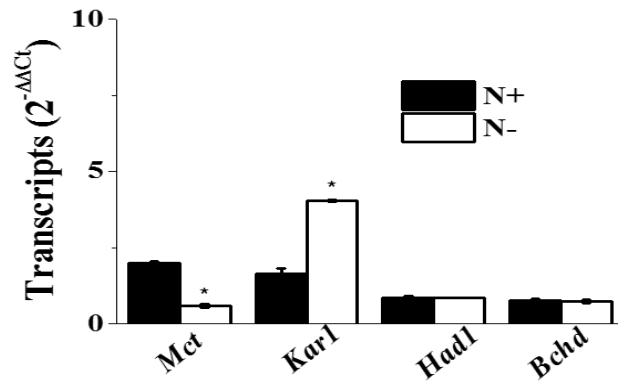

1  
2  
3 **Figure S2. Transcript levels of chloroplast fatty acid synthesis genes in *N. salina* cells grown under**  
4 **N+ and N- conditions for 2 days.** Each data point represents the mean  $\pm$  SE of three biological and  
5 technical triplicate culture flasks.  
6  
7

1

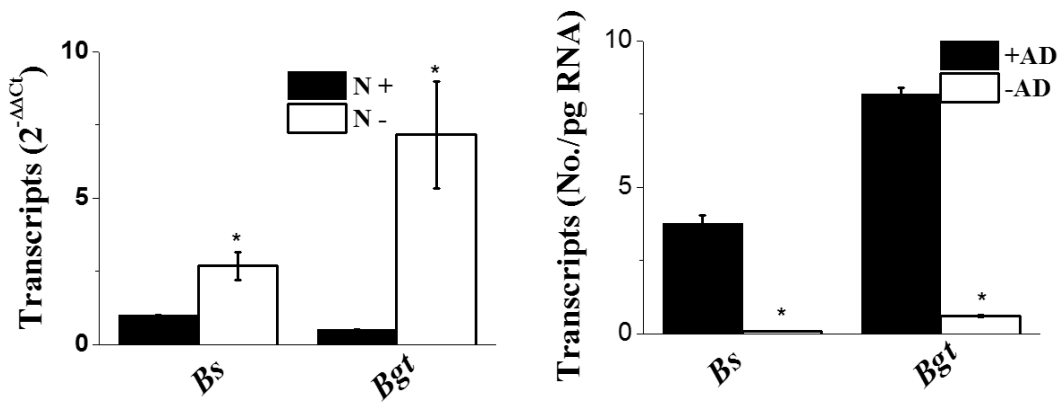

2

3

4

5

6

7

8

9

10

**Figure S3. Transcript levels of laminarin (*Bs* and *Bgt*) synthesis genes in *N. salina* cells.** Cells were under *N+* and *N-* conditions for 2 days. The transcription inhibitor actinomycin D (AD,  $100 \mu\text{g ml}^{-1}$ ) was included in *N-* media for 2 days before the onset of *N-* growth. Absolute copy numbers of the mRNA transcripts (number of copies/ng of total RNA) were determined by qRT-PCR analysis. Each data point represents the mean  $\pm$  SE of three biological and technical triplicate culture flasks.

1

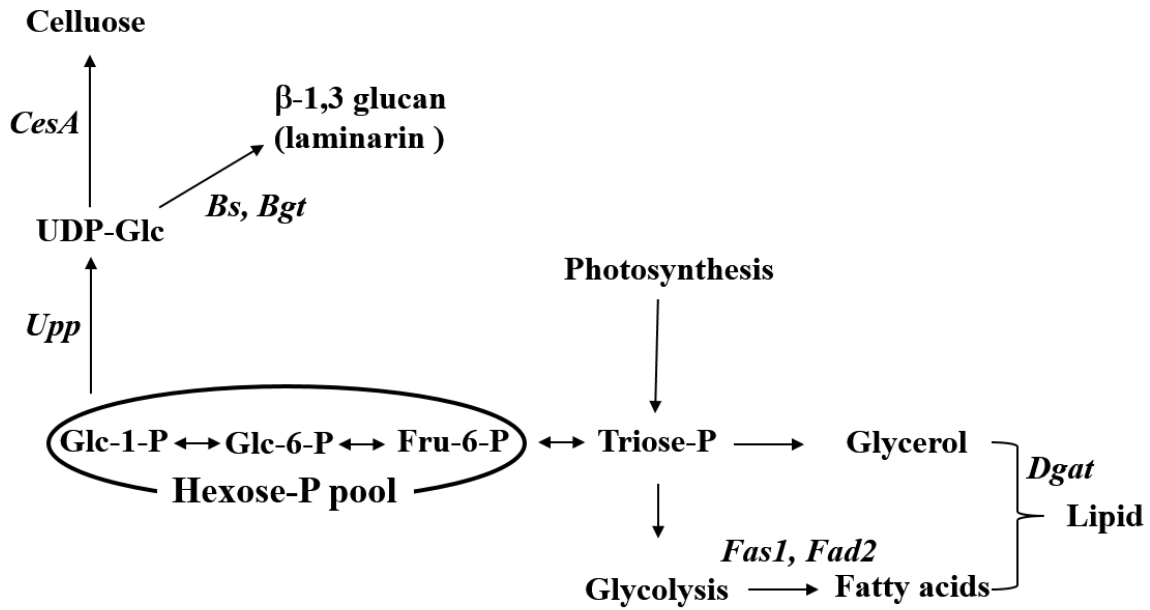

2

3

4

5

6

7

8

9

10

11

12

13

14

15

**Figure S4. Carbon partitioning in N-deprived *N. salina*.** Under N-deficient conditions, total fatty acid and neutral lipid contents increase due to conversion of photosynthate assimilates via transcriptional activation of putative cytoplasmic fatty acid synthase (*Fas1*),  $\Delta 12$ -desaturase (*Fad2*), and diglyceride acyltransferase (*Dgat*). Partitioning of hexose phosphate pools into cellulose biosynthesis appears to be transcriptionally regulated by the upregulation of UDP-glucose (Glc) pyrophosphorylase (*Upp*) and cellulose synthase (*CesaA*) activities. N-deficiency increases laminarin biosynthesis in *N. oceanica*. Repression of 1,3- $\beta$ -glucan synthase (*Bs*) and  $\beta$ -1,3-glucosyltransferase (*Bgt*) transcript levels by the transcription inhibitor actinomycin D in *N. salina* indicated the concerted regulation of photoassimilate partitioning into storage and structural carbohydrates in response to N status.

**Supplementary Table S1. Effect of the transcription inhibitor actinomycin D on neutral lipid and cellulose content in *N. salina* cells under nitrogen-depleted (N-) conditions.** Neutral lipid and cellulose contents were estimated by Nile Red fluorescence amplitude at 580 nm ( $F_{580}$ ) and calcofluor white amplitude at 420 nm ( $F_{420}$ ) relative to those before N- induction, respectively. Data are expressed as the average of three biological replicates  $\pm$  SD. Each sample was significantly different from the other (independent two-tailed *t*-test, *p*-value <0.05).

|                    | Neutral lipid ( $F_{580}$ ) | Cellulose ( $F_{420}$ ) |
|--------------------|-----------------------------|-------------------------|
| N-                 | 12.18 $\pm$ 0.67            | 1.50 $\pm$ 0.08         |
| N- + actinomycin D | 9.48 $\pm$ 0.68             | 0.79 $\pm$ 0.07         |

**Supplementary Table S2. Primer sequences for qRT-PCR analysis.**

| Gene             | Description                                                 | Primer forward (5' to 3') | Primer reverse (5' to 3') | Reference (GenBank) |
|------------------|-------------------------------------------------------------|---------------------------|---------------------------|---------------------|
| <i>Bgt</i>       | $\beta$ -1,3-glucosyltransferase                            | ATGTCTTGGAGGCCATGGAG      | TTTGCTCGTGGTCGTCAGC       | AFGQ01002665.1      |
| <i>Bs</i>        | 1,3- $\beta$ -glucan synthase                               | GGCGTGGTAATAAGCGAC        | GTTTCAGTAAAGCTGATGCC      | AFGQ01002722.1      |
| <i>Bcdh</i>      | Branched-chain $\alpha$ -keto acid dehydrogenase subunit E2 | CTGATCACGCCACCCTC         | CGTTTCTCCTGCGCTTTC        | AFGQ01001567.1      |
| <i>CesA8</i>     | Cellulose synthase                                          | ATTCAACACTTGTTTAGC        | CGGTAGCTGATATTCATG        | AFGQ01004415.1      |
| <i>CesA122-1</i> | Cellulose synthase                                          | CCCAAGCTGTATTTGATG        | GAGAGGATGTAGTAGAGC        | AFGQ01001844.1      |
| <i>Dgat-2</i>    | Diacylglycerol acyltransferase type 2-5                     | GATGATGAGCTGGTACTACC      | GCTTCTCCAGAATGTATTTCG     | AFGQ01000682.1      |
| <i>Fad2</i>      | $\Delta$ 12 desaturase                                      | CACCCTTGCTGACATCAAAG      | CGCATTTCATGGGCAATCAC      | AFGQ01000627.1      |
| <i>Fad1</i>      | $\Delta$ 5 desaturase                                       | CTACATGCTGCGAGACTTTG      | GGTTCTCGAGCAAGGCTTG       | AFGQ01001226.1      |
| <i>Fas1a</i>     | Type I fatty acid synthase                                  | ACACGGCGTGCTCGTCATC       | GCATCAAGCATAAGATTCAC      | KK037387.1          |
| <i>Fas1b</i>     | Type I fatty acid synthase                                  | TTGCAGCGTGTAGTGCTG        | AAGCATCTCCCAAAAAGCC       | KK037387.1          |
| <i>Had1</i>      | 3-hydroxy acyl ACP dehydratase                              | ATGGAGGTGGAAGTGGTC        | CTTGATTTTCGACGGCCAC       | AFGQ01000652.1      |
| <i>Kar1</i>      | 3-ketoacyl-ACP reductase I                                  | GACGGCATTAAAGAAGGCG       | TAGCAATGCCCTCCATCGAC      | AFGQ01000162.1      |
| <i>Mct</i>       | Malonyl-CoA:ACP transacylase                                | CGAATGACAGTGCGTCTG        | GAACTCTGTCTTGGCCAAC       | AFGQ01000324.1      |
| <i>Pksa</i>      | Type I fatty acid synthase-like                             | CTTGAGGTTGGGTACTGTC       | GAATATAACCAACGTTTCGCG     | KK037387.1          |
| <i>Pksb</i>      | Type I fatty acid synthase-like                             | ACTGCTTTTGTTGCCCTCGC      | GAATGACTTGCATTTACCATC     | AFGQ01003363.1      |
| <i>Pksc</i>      | Type I fatty acid synthase-like                             | CCGAGTATATTTTCGACGAC      | ATATTGCACGGCAGCAAGGC      | AFGQ01000753.1      |
| <i>Pkse</i>      | Type I fatty acid synthase-like                             | GATCGAACGCAGTCTTCG        | TTGAATCTTTGTCTCCTTGC      | AFGQ01000951.1      |
| <i>Ubq</i>       | Ubiquitin                                                   | GGCAAGACGATCACACTGGA      | AAAGCGCGTCTCCACCAC        | AFGQ01000799.1      |
| <i>Upp</i>       | UDP-glucose pyrophosphorylase                               | CGCATACCAAATGGGGTC        | TTTAGCGTTCACATTCGCG       | AFGQ01003838.1      |
